# Supplementary material
Source: PubMed Central journal article supplement (PMC3403103)
Supplement: supp_139.16.2935_DEV081471TableS1.pdf [file supp_139.16.2935_DEV081471TableS1.pdf]

**Table S1. Taqman assay IDs for all genes analyzed by qPCR**

| <b><u>Gene</u></b> | <b><u>Assay ID/Part number</u></b> |
|--------------------|------------------------------------|
| ADAM10             | Gg03364319_m1                      |
| ADAM33             | Gg03361516_m1                      |
| ANKK1              | Gg03644038_m1                      |
| BAMBI              | AJS065I                            |
| BMPR1A             | Gg03339693_m1                      |
| BMPR1B             | Gg03366638_m1                      |
| BMPR2              | Gg03345679_m1                      |
| CCL19              | Gg03321902_m1                      |
| CCR7               | AJCSUTO                            |
| CCR9               | Gg03360247_s1                      |
| CDH11              | Gg03346205_m1                      |
| CDH2               | Gg03345814_m1                      |
| CDH6               | Gg03345958_m1                      |
| CDH7               | Gg03363795_m1                      |
| CFC1B              | Gg03338500_m1                      |
| COL2A1             | Gg03365340_m1                      |
| CTNNB1             | Gg03348503_m1                      |
| CXCL12             | Gg03365914_m1                      |
| CXCL13             | AJGJPCE                            |
| CXCL8              | Gg03349360_m1                      |
| CXCR1              | Gg03813372_s1                      |
| CXCR4              | AI5IOS0                            |
| CXCR5              | Gg03344612_s1                      |
| DLX5               | Gg03363550_m1                      |
| EDNRA              | Gg03363278_m1                      |
| EFNB2              | Gg03338769_m1                      |
| ELAV4              | Gg03338811_m1                      |
| EphA2              | AIMSF5V                            |
| EphA3              | Gg03340036_m1                      |
| EphA4              | Gg03371260_m1                      |
| EphB1              | Gg03320093_m1                      |
| EphB2              | Gg03349515_m1                      |
| EphB3              | Gg03320080_m1                      |
| FGFR1              | Gg03340352_m1                      |
| FGFR2              | Gg03349085_m1                      |
| FGFR3              | Gg03340332_m1                      |
| FoxD3              | Gg03815041_s1                      |
| FZD7               | Gg03814026_s1                      |
| GAPDH              | Gg03346982_m1                      |
| GPC3               | AJLJH36                            |
| HAND2              | Gg03347768_m1                      |
| ISL1               | Gg03339945_m1                      |
| ITGA1              | Gg03366240_m1                      |
| ITGA4              | Gg03320337_m1                      |
| ITGA6              | Gg03348770_m1                      |
| ITGA9              | Gg03342773_m1                      |
| ITGAV              | Gg03371423_m1                      |
| ITGB1              | Gg03357875_m1                      |

|           |               |
|-----------|---------------|
| ITGB3     | Gg03346999_m1 |
| ITGB5     | Gg03365690_m1 |
| JAG1      | Gg03332179_m1 |
| keratin15 | Gg03345598_m1 |
| keratin19 | Gg03348102_m1 |
| MBP       | Gg03367316_m1 |
| MITF      | Gg03348224_m1 |
| MMP2      | Gg03365286_m1 |
| MMP9      | Gg03338321_m1 |
| MSX1      | Gg03349356_m1 |
| NCAM2     | AJS062L       |
| Nedd9     | Gg03310488_m1 |
| NEFM      | Gg03361912_m1 |
| NESTN     | Gg03348251_m1 |
| NeuroG2   | Gg03814822_s1 |
| Notch1    | Gg03317671_m1 |
| Nrp1      | Gg03371276_m1 |
| Nrp2      | Gg03364413_m1 |
| Pax3      | Gg03364367_m1 |
| PCDH1     | Gg03360150_m1 |
| PCDH10    | Gg03349770_m1 |
| PCDH19    | Gg03361701_m1 |
| PDGFRL    | Gg03328159_m1 |
| RhoB      | Gg03339342_s1 |
| RUNX2     | Gg03363363_m1 |
| Slit2     | Gg03310613_m1 |
| Slug      | Gg03333502_m1 |
| Snail1    | Gg03366757_m1 |
| Sox10     | Gg03371326_m1 |
| Sox9      | Gg03364395_m1 |
| TFAP2A    | Gg03366419_m1 |
| TGFBR1    | Gg03364206_m1 |
| TH        | Gg03338713_m1 |
| UNC5B     | Gg03352386_m1 |
| VEGFR2    | Gg03346169_m1 |
| WISP1     | Gg03343963_m1 |
| 18S       | 4352930E      |
